# Supplementary material
Source: Springer Nature journal article supplement (https://www.springermedizin.de/resource/supplementary/12913_2011_1665_MOESM1_ESM.pdf/9528666)
Supplement: MOESM1 [file 9528666]

Randomize all women 51-84, in plan  $\geq 24$  mo. and with current plan PCP to 3 Study Arms

Measure Primary Outcome at Baseline and End of Each Study Year  
Proportion of Women Enrolled  $\geq 24$  mo. with a Mammogram within the Last 24 Months

Year 1

Year 2

Year 3

Year 4

Identify new members age 51-84 and women turning 51, enroll and randomize to 3 study arms

Disenroll women who leave the plan, turn 85, request or whose PCPs request disenrollment,
